# Supplementary material
Source: MDPI journal article supplement (https://www.mdpi.com/2076-3417/12/16/8244)
Supplement: s1 [file s1 › applsci-1824375-supplementary.pdf]

**Single Cell RNA-Sequence Analyses Reveal Uniquely Expressed Genes  
and Heterogeneous Immune Cell Involvement in the Rat Model of  
Intervertebral Disc Degeneration  
Supplemental Data—August 11, 2022**

Milad Rohanifar <sup>1</sup>, Sade W. Clayton <sup>2</sup>, Garrett W.D. Easson <sup>2</sup>, Deepanjali S. Patil <sup>1</sup>, Frank Lee <sup>1</sup>,  
Liufang Jing <sup>1</sup>, Marcos N. Barcellona <sup>1</sup>, Julie E. Speer <sup>1</sup>, Jordan J. Stivers <sup>2</sup>, Simon Y. Tang <sup>2</sup>  
and Lori A. Setton <sup>1,2,\*</sup>

<sup>1</sup>Department of Biomedical Engineering, Washington University in St. Louis,  
St. Louis, MO 63130, USA

<sup>2</sup>Department of Orthopedic Surgery, Washington University School of Medicine,  
St. Louis, MO 63110, USA

Corresponding: [setton@wustl.edu](mailto:setton@wustl.edu)

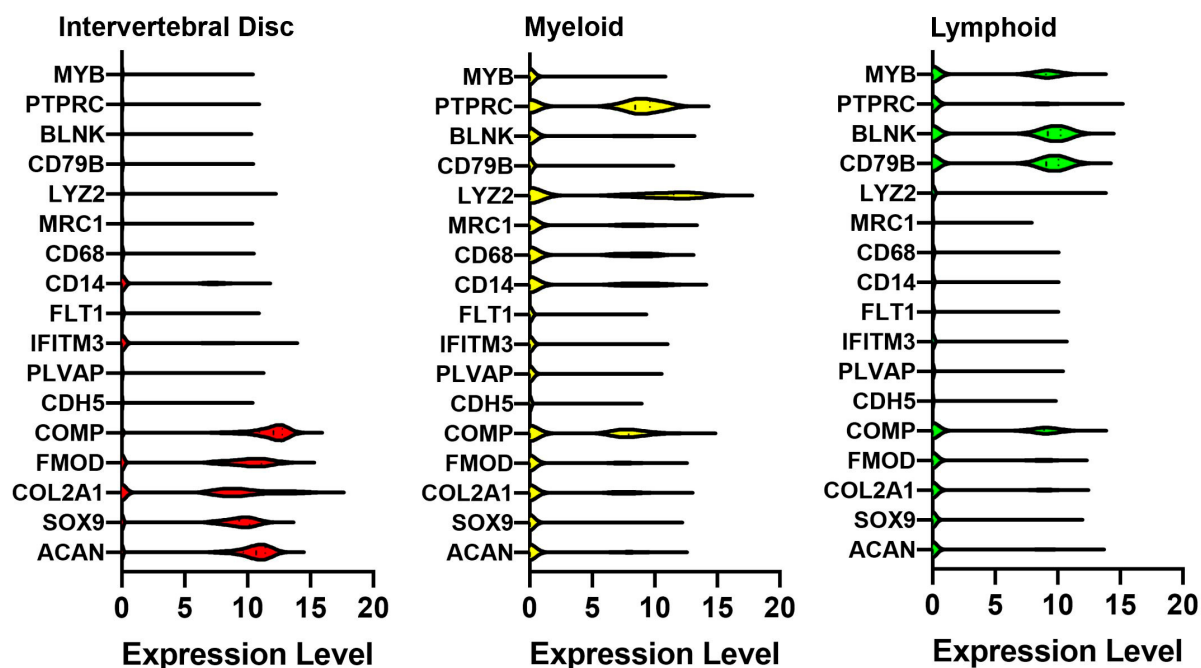

Figure S1. Expression level of marker genes within intervertebral disc cells, myeloid, and lymphoid cells from CON samples at 8 weeks post-surgery.

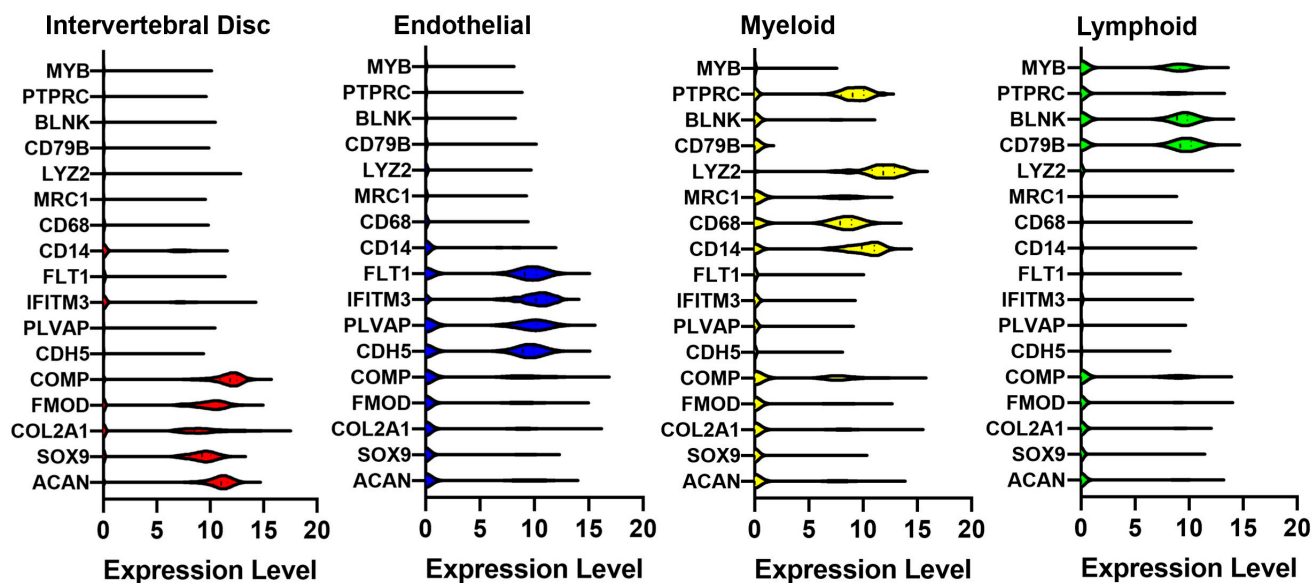

Figure S2. Expression level of marker genes within intervertebral disc cells, endothelial cells, myeloid, and lymphoid cells from LDP samples at 8 weeks post-surgery.
